# Supplementary material
Source: publisher figshare collection journal article supplement (https://acs.figshare.com/ndownloader/files/5161696)

## Supporting Information for

Efficient Palladium-Catalyzed Cross-Coupling of  $\beta$ -chloro-alkylidene/arylidene Malonates using Microwave Chemistry**Rajamohan R. Poondra, Peter M. Fischer and Nicholas J. Turner \***

*School of Chemistry, University of Edinburgh, Kings Buildings, West Mains Road, Edinburgh, EH9 3JJ, UK and Cyclacel Ltd, James Lindsay Place, Dundee DD1 5JJ, UK*

|                                                                       |     |
|-----------------------------------------------------------------------|-----|
| Contents                                                              |     |
| General experimental information                                      | S2  |
| General procedure for cross-coupling reaction                         | S3  |
| Characterization data of compound (entry 1)                           | S3  |
| Characterization data of compounds (entry 2&3)                        | S4  |
| Characterization data of compounds (entry 4&5)                        | S5  |
| Characterization data of compounds (entry 6&7)                        | S6  |
| Characterization data of compounds (entry 8&9)                        | S7  |
| Characterization data of compounds (entry 10&11)                      | S8  |
| Characterization data of compounds (entry 12&13)                      | S9  |
| Characterization data of compounds (entry 14&15)                      | S10 |
| $^1\text{H}$ NMR & $^{13}\text{C}$ NMR spectra of compound (entry1)   | S11 |
| $^1\text{H}$ NMR & $^{13}\text{C}$ NMR spectra of compound (entry3)   | S12 |
| $^1\text{H}$ NMR spectra of compound (entry2)                         | S13 |
| $^1\text{H}$ NMR & $^{13}\text{C}$ NMR spectra of compound (entry 4)  | S14 |
| $^1\text{H}$ NMR spectra of compounds (entry 5&6)                     | S15 |
| $^1\text{H}$ NMR spectra of compounds (entry 7&8)                     | S16 |
| $^1\text{H}$ NMR & $^{13}\text{C}$ NMR spectra of compound (entry 9)  | S17 |
| $^1\text{H}$ NMR spectra of compounds (entry 10&11)                   | S18 |
| $^1\text{H}$ NMR & $^{13}\text{C}$ NMR spectra of compound (entry 12) | S19 |
| $^1\text{H}$ NMR & $^{13}\text{C}$ NMR spectra of compound (entry 13) | S20 |
| $^1\text{H}$ NMR & $^{13}\text{C}$ NMR spectra of compound (entry 14) | S21 |
| $^1\text{H}$ NMR & $^{13}\text{C}$ NMR spectra of compound (entry 15) | S22 |

**General experimental information:**

Unless otherwise noted, all materials were obtained from commercial suppliers and used without further purification. THF was dried and distilled from sodium/benzophenone.  $K_2CO_3$  was purchased dry from commercial suppliers and dried under vacuum at 120 °C for 24h. Thin-Layer Chromatography was performed on precoated plates, silica gel 60 F<sub>254</sub> and visualizing with ultraviolet light and iodine spray. Flash chromatography on silica gel. All melting points are uncorrected. Infrared spectra were observed as KBr pellets or neat. All  $^1H$  NMR and  $^{13}C$  NMR spectra were recorded in  $CDCl_3$  and  $DMSO-d_6$  solutions using the residual solvent peak as internal reference. Spin multiplicities are given as s (singlet), d (doublet), t (triplet), q (quartet), and m (multiplet) as well as b (broad). Coupling constants (J) are given in hertz. Mass spectra Electro spray and HRMS were obtained.

All microwave irradiation experiments were carried out using the Explorer PLS.<sup>TM</sup> The reactions were performed in heavy-walled Pyrex tubes (10 ml, 1= 150 mm) sealed with a septum utilizing the standard absorbance level (300 W maximum power). The reaction volume filled not more than ¼<sup>th</sup> of the total volume of the tube. All couplings and other reactions were conducted in the presence of stirring and external cooling.

**General Procedure for the Reaction of  $\beta$ -chloro-arylidene/alkyldenemalonates with arylboronic acids:**

POPd (1mol %),  $\beta$ -Chloro-alkylidene/arylidene malonate (1.00 mmol), arylboronic acid (1.50 to 2.00 mmol), and  $K_2CO_3$  (3.00 mmol) were weighed in a microwave tube, equipped with a magnetic stirrer bar, and sealed with a silicon septum. THF (2 to 3 mL) was injected into the tube *via* a syringe and the reaction mixture was subjected to microwave irradiation for 30 min at 100  $^{\circ}C$ . The reaction vessel was allowed to cool to room temperature and the crude reaction mixture transferred to a separating funnel and diluted with hexane (50mL) and  $H_2O$  (15mL). The layers were separated, the organic layer was washed with  $H_2O$  (20 mL) and brine (20 mL), dried over  $MgSO_4$ , and filtered, and solvents were removed from the filtrate by rotary evaporation. The resulting residue was chromatographed on silica gel using ethyl acetate/hexane as eluant.

**2-[1-(3-Chlorophenyl) ethylidene] malonic acid diethyl ester (Entry 1):**

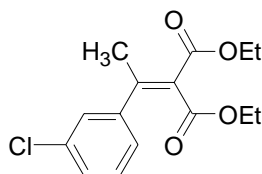

2-[1-(3-Chlorophenyl) ethylidene] malonic acid diethyl ester was prepared using the general procedure. POPd (12 mg, 0.023 mmol, 1% mol), 2-(1-Chloro-ethylidene)-malonic acid diethyl ester (0.5 g, 2.26 mmol), 3-chlorophenyl boronic acid (0.532 g, 3.40 mmol), and  $K_2CO_3$  (0.940 g, 6.80 mmol) in THF (3mL) yielded 0.470 g (70% yield) of the title product as a colorless liquid.  $R_f$  = 0.5 (hexane/ethyl acetate = 9:1); IR (Neat): 2982, 1725, 1628, 1563, 1473, 1445, 1228  $cm^{-1}$ .  $^1H$  NMR (250 MHz,  $CDCl_3$ ):  $\delta$  7.45 (m, 3H), 7.31 (s, 1H), 4.49 (q,  $J$  = 7.14 Hz, 2H), 4.20 (q,  $J$  = 7.15 Hz, 2H), 2.59 (s, 3H), 1.51 (t,  $J$  = 7.13 Hz, 3H), 1.21 (t,  $J$  = 7.13 Hz, 3H).  $^{13}C$  NMR (63 MHz,  $CDCl_3$ ):  $\delta$  165.5, 164.4, 153.5, 143.1, 134.1, 129.5, 128.3, 126.7, 124.7, 61.8, 22.5, 13.9. HRMS ( $ESI^+$ ):  $m/z$  calculated for  $C_{15}H_{17}ClO_4$ , 296.0815; found, 296.0813.

**2-[1-(3, 5-Difluoro phenyl) ethylidene] malonic acid diethyl ester (Entry 2):**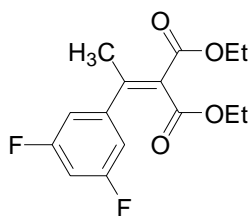

2-[1-(3,5-Difluoro phenyl) ethylidene] malonic acid diethyl ester was prepared using the general procedure. POPd, (11.3 mg, 0.02 mmol, 1 % mol), 2-(1-Chloro-ethylidene)-malonic acid diethyl ester (0.5 g, 2.26 mmol), 3,5-fluorophenyl boronic acid (0.716 g, 4.53 mmol), and  $K_2CO_3$  (0.940g, 6.80 mmol) in THF (3mL) yielded 0.4 g (59 % yield) of the title product as a colorless liquid.  $R_f$  = 0.4 (hexane/ethyl acetate = 8:2); IR (Neat): 2984, 1726, 1641, 1620, 1590, 1492, 1446, 1236  $cm^{-1}$ .  $^1H$  NMR (250 MHz,  $CDCl_3$ ):  $\delta$  7.25 (m, 2H), 7.11 (m, 1H), 4.55 (q,  $J$  = 7.12 Hz, 2H), 4.25 (q,  $J$  = 7.12 Hz, 2H), 2.57 (s, 3H), 1.58 (t,  $J$  = 7.11 Hz, 3H), 1.28 (t,  $J$  = 7.12 Hz, 3H). HRMS ( $EI^+$ ):  $m/z$  calculated for  $C_{15}H_{16}F_2O_4$ , 298.1017; found, 298.1020.

**2-[1-(3, 5-Dimethyl phenyl) ethylidene] malonic acid diethyl ester (Entry 3):**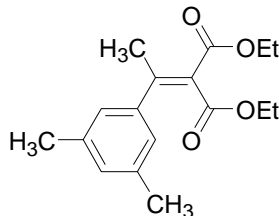

2-[1-(3,5-Dimethyl phenyl) ethylidene] malonic acid diethyl ester was prepared using the general procedure. POPd, (6 mg, 0.011 mmol, 1 % mol), 2-(1-Chloro-ethylidene)-malonic acid diethyl ester (0.250 g, 1.13 mmol), 3,5-methylphenyl boronic acid (0.255 g, 1.70 mmol), and  $K_2CO_3$  (0.470 g, 3.40 mmol) in THF (2mL) yielded 0.2 g (60 % yield) of the title product as a colorless liquid.  $R_f$  = 0.5 (hexane/ethyl acetate = 9:1); IR (Neat): 2981, 1724, 1623, 1445, 1266, 1223  $cm^{-1}$ .  $^1H$  NMR (250 MHz,  $CDCl_3$ ):  $\delta$  7.11 (s, 1H), 7.01 (s, 2H), 4.43 (q,  $J$  = 7.12 Hz, 2H), 4.15 (q,  $J$  = 7.13 Hz, 2H), 2.56 (s, 3H), 2.45 (s, 6H) 1.47 (t,  $J$  = 7.11 Hz, 3H), 1.15 (t,  $J$  = 7.12 Hz, 3H).  $^{13}C$  NMR (63 MHz,  $CDCl_3$ ):  $\delta$  166.2, 164.6, 156.0, 141.4, 137.6, 129.9, 125.7, 124.2, 60.8, 22.6, 13.9. HRMS ( $EI^+$ ):  $m/z$  calculated for  $C_{17}H_{12}O_4$ , 290.1518; found, 290.1520.

**2-[1-(4-Methoxyphenyl)-ethylidene]-malonic acid diethyl ester (Entry 4):**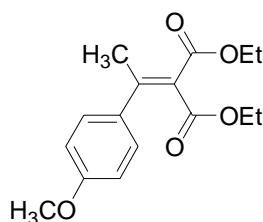

2-[1-(4-Methoxyphenyl)-ethylidene]-malonic acid diethyl ester was prepared using the general procedure. POPd, (6 mg, 0.011 mmol, 0.1 % mol), 2-(1-Chloro-ethylidene)-malonic acid diethyl ester (0.250 g, 1.13 mmol), 4-methoxyphenyl boronic acid (0.258 g, 1.70mmol), and  $K_2CO_3$  (0.470 g, 3.40 mmol) in THF (3mL) yielded 0.210 g (65% yield) of the title product as a colorless liquid.  $R_f$  = 0.5 (hexane/ethyl acetate = 8:2).  $^1H$  NMR (250 MHz,  $CDCl_3$ ):  $\delta$  7.13 (d,  $J$  = 8.48 Hz, 2H), 6.78 (d,  $J$  = 8.57 Hz, 2H), 4.50 (q,  $J$  = 7.10 Hz, 2H), 3.94 (q,  $J$  = 7.10 Hz, 2H), 3.73 (s, 3H), 2.35 (s, 3H), 1.25 (t,  $J$  = 7.11 Hz, 3H), 0.97 (t,  $J$  = 7.12 Hz, 3H).  $^{13}C$  NMR (63 MHz,  $CDCl_3$ ):  $\delta$  166.5, 164.7, 159.7, 155.4, 133.6, 128.1, 125.4, 113.5, 60.8, 55.1, 22.6, 13.9. MS ( $ES^+$ ):  $m/z$  (relative intensity) 292( $M^+$ , 15), 260 (15), 172 (20), 110 (55), 97 (100), 80 (15).

**2-[1-(5-Fluoro-2-methoxyphenyl) ethylidene]malonic acid diethyl ester (Entry 5):**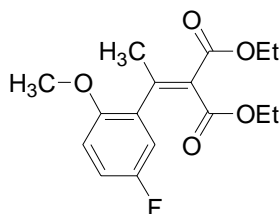

2-[1-(5-Fluoro-2-methoxyphenyl) ethylidene] malonic acid diethyl ester was prepared using the general procedure. POPd, (11.5 mg, 0.02 mmol, 1 % mol), 2-(1-Chloro-ethylidene)-malonic acid diethyl ester (0.5 g, 2.26 mmol), 2-methoxy-5-fluorophenyl boronic acid (0.770g, 4.53 mmol), and  $K_2CO_3$  (0.940g, 6.80 mmol) in THF (3mL) yielded 0.280 g (66 % yield) of the title product as a colorless liquid.  $R_f$  = 0.5 (hexane/ethyl acetate = 9:1); IR (Neat): 2982, 1725, 1637, 1610, 1594, 1465  $cm^{-1}$ .  $^1H$  NMR (250 MHz,  $CDCl_3$ ):  $\delta$  7.27 (m, 3H), 4.55 (q,  $J$  = 7.11 Hz, 2H), 4.27 (q,  $J$  = 7.15 Hz, 2H), 4.06 (s, 3H), 2.60 (s, 3H), 1.57 (t,  $J$  = 7.15 Hz, 3H), 1.23 (t,  $J$  = 7.14 Hz, 3H). HRMS ( $EI^+$ ):  $m/z$  calculated for  $C_{16}H_{19}FO_5$ , 310.1217; found 310.1216.

**2-[-(3-Nitrophenyl) ethylidene] malonic acid diethyl ester (Entry 6):**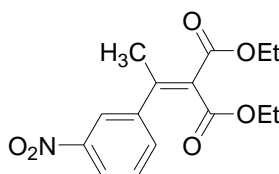

2-[-(3-Nitrophenyl) ethylidene] malonic acid diethyl ester was prepared using the general procedure. POPd, (11.3 mg, 0.02 mmol, 1 % mol), 2-(1-Chloro-ethylidene)-malonic acid diethyl ester (0.5 g, 2.26 mmol), 3-nitrophenyl boronic acid (0.757g, 4.53 mmol), and  $K_2CO_3$  (0.940g, 6.80 mmol) in THF (3mL) yielded 0.3 g (72 % yield) of the title product as a colorless liquid.  $R_f$  = 0.3 (hexane/ethyl acetate = 9:1); IR (Neat): 2984, 1724, 1631, 1574, 1474, 1446  $cm^{-1}$ .  $^1H$  NMR (250 MHz,  $CDCl_3$ ):  $\delta$  8.12 (m, 1H), 8.05 (s, 1H), 7.48 (m, 2H), 4.25 (q,  $J$  = 7.17 Hz, 2H), 3.92 (q,  $J$  = 7.13 Hz, 2H), 2.33 (s, 3H), 1.29 (t,  $J$  = 7.09 Hz, 3H), 0.97 (t,  $J$  = 7.11 Hz, 3H). HRMS ( $ESI^+$ ):  $m/z$  calculated for  $C_{15}H_{17}NO_6$ , 307.1056; found, 307.1049.

**2-(2-Methyl-1-phenylpropylidene) malonic acid diethyl ester (Entry 7):**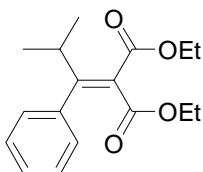

2-(2-Methyl-1-phenylpropylidene) malonic acid diethyl ester was prepared using the general procedure. POPd, (10 mg, 0.012 mmol, 1 % mol), 2-(1-Chloro-2-methyl propylidene) malonic acid diethyl ester (0.5g, 2.0 mmol), 3-phenyl boronic acid (0.294 g, 2.40 mmol), and  $K_2CO_3$  (0.834 g, 6.03 mmol) in THF (3mL) yielded 0.250 g (71 % yield) of the title product as a colorless liquid.  $R_f$  = 0.4 (hexane/ethyl acetate = 9:1).  $^1H$  NMR (250 MHz,  $CDCl_3$ ):  $\delta$  7.37 (m, 3H), 7.12 (m, 2H), 4.40 (q,  $J$  = 7.14 Hz, 2H), 3.94 (q,  $J$  = 7.17 Hz, 2H), 3.57 (m, 1H), 1.40 (t,  $J$  = 7.14 Hz, 3H), 1.07 (d,  $J$  = 6.84 Hz, 6H), 0.99 (t,  $J$  = 7.14 Hz, 3H). MS ( $ES^+$ ):  $m/z$  (relative intensity) 313 ( $M+Na$ , 100), 240 (5), 163 (25).

**2-[1-(3-Chlorophenyl)-2-methylpropylidene] malonic acid diethyl ester (Entry 8):**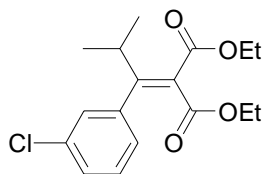

2-[1-(3-Chlorophenyl)-2-methylpropylidene] malonic acid diethyl ester was prepared using the general procedure. POPd, (6 mg, 0.012 mmol, 1% mol), 2-(1-Chloro-2-methyl propylidene) malonic acid diethyl ester (0.3g, 1.20 mmol), 3-chlorophenyl boronic acid (0.283 g, 0.181 mmol)  $\text{K}_2\text{CO}_3$  (0.5 g, 3.62 mmol) in THF (2mL) yielded (0.15 g, 57% yield) of the title product as a colorless liquid. IR (Neat): 2978, 1726, 1624, 1563, 1466, 1446  $\text{cm}^{-1}$ .  $^1\text{H}$  NMR (250 MHz,  $\text{CDCl}_3$ ):  $\delta$  7.45 (m, 2H), 7.26 (m, 1H), 7.14 (m, 1H), 4.49 (q,  $J = 3.45$  Hz, 2H), 4.07 (q,  $J = 7.14$  Hz, 2H), 3.60 (m, 1H), 1.52 (t,  $J = 3.74$  Hz, 3H), 1.20 (s, 3H), 1.87 (s, 3H), 1.13 (t,  $J = 7.14$  Hz, 3H); HRMS ( $\text{EI}^+$ ):  $m/z$  calculated for  $\text{C}_{17}\text{H}_{21}\text{ClO}_4$ , 324.1128; found, 324.1297.

**2-[1-(3-Fluoro phenyl)-2-methylpropylidene] malonic acid diethyl ester(Entry 9):**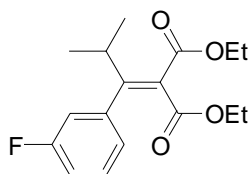

2-[1-(3-Fluoro phenyl)-2-methyl propylidene] malonic acid diethyl ester was prepared using the general procedure. POPd, (10 mg, 0.02 mmol, 1 % mol), 2-(1-Chloro-2-methyl propylidene) malonic acid diethyl ester (0.5 g, 2.0 mmol), 3-fluorophenyl boronic acid (0.337 g, 2.40 mmol), and  $\text{K}_2\text{CO}_3$  (0.834 g, 6.0 mmol) in THF (3mL) yielded 0.340 g (55 % yield) of the title product as a colorless liquid.  $R_f = 0.6$  (hexane/ethyl acetate = 9:1).  $^1\text{H}$  NMR (250 MHz,  $\text{CDCl}_3$ ):  $\delta$  7.28 (m, 1H), 7.02 (m, 1H), 6.84 (m, 2H), 4.30 (q,  $J = 7.13$  Hz, 2H), 3.92 (q,  $J = 7.13$  Hz, 2H), 3.46 (m, 1H), 1.04 (d,  $J = 7.13$  Hz, 6H), 0.96 (t,  $J = 7.14$  Hz, 3H).  $^{13}\text{C}$  NMR (63 MHz,  $\text{CDCl}_3$ ):  $\delta$  164.8, 163.8, 161.4, 159.9, 138.3, 129.0, 126.1, 123.6, 115.3, 61.2, 31.9, 20.5, 13.9. MS ( $\text{ES}^+$ ):  $m/z$  (relative intensity) 331( $\text{M}^+$ , +Na, 5), 300 (40), 198 (18), 130 (100), 73 (10), 61(50).

**2-[1-(5-Fluoro-2-methoxyphenyl)-2-methylpropylidene] malonic acid diethyl ester (Entry 10):**

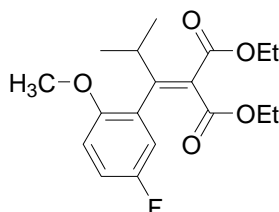

2-[1-(5-Fluoro-2-methoxyphenyl)-2-methylpropylidene] malonic acid diethyl ester was prepared using the general procedure. POPd, (10 mg, 0.019 mmol, 1 % mol), 2-(1-Chloro-2-methyl propylidene) malonic acid diethyl ester (0.5 g, 2.0 mmol), 2-methoxy-5-fluorophenyl boronic acid (0.684 g, 4.0 mmol), and  $K_2CO_3$  (0.830 g, 6.0 mmol) in THF (3mL) yielded 0.250 g (52 % yield) of the title product as a colorless liquid.  $R_f$  = 0.5 (hexane/ethyl acetate = 9:1); IR (Neat): 2979, 1726, 1628, 1607, 1495, 1465  $cm^{-1}$ .  $^1H$  NMR (250 MHz,  $CDCl_3$ ):  $\delta$  7.18 (m, 1H), 6.98 (m, 1H), 6.88 (m, 1H), 4.51 (m, 2H), 4.11 (q,  $J$  = 7.16 Hz, 2H), 3.96 (s, 3H), 3.57 (m, 1H), 1.35 (t,  $J$  = 7.14 Hz, 3H), 1.21 (m, 9H). HRMS ( $EI^+$ ):  $m/z$  calculated for  $C_{18}H_{23}FO_5$ , 338.1530; found, 338.1528.

**2-[(3-Chloro-phenyl)-phenylmethylene] malonic acid diethyl ester (Entry 11):**

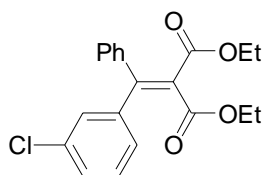

2-[(3-Chloro-phenyl)-phenylmethylene] malonic acid diethyl ester was prepared using the general procedure. POPd, (3.5 mg, 0.0069 mmol, 1% mol), 2-(Chloro-phenyl methylene) malonic acid diethyl ester (0.2 g, 0.707mmol), 3-chlorophenyl boronic acid (0.166 g, 1.06 mmol), and  $K_2CO_3$  (0.293 g, 2.12 mmol) in THF (2mL) yielded 0.14 g (55% yield) of the title product as a colorless liquid.  $R_f$  = 0.5 (hexane/ethyl acetate = 9:1); IR (Neat): 2982, 1728, 1591, 1472, 1444  $cm^{-1}$ .  $^1H$  NMR (250 MHz,  $CDCl_3$ ):  $\delta$  7.18 (m, 9H), 4.04(m, 4H), 0.97(m, 6H). HRMS ( $EI^+$ ):  $m/z$  calculated for  $C_{20}H_{19}ClO_4$ , 358.0972; found, 358.0975.



**2-[(5-Fluoro-2-methoxyphenyl) phenylmethylene] malonic acid diethyl ester****(Entry 12):**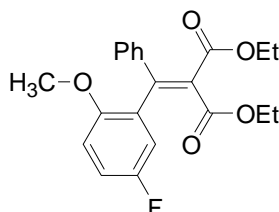

2-[(5-Fluoro-2-methoxyphenyl) phenylmethylene] malonic acid diethyl ester was prepared using the general procedure. POPd, (9 mg, 0.017 mmol 1% mol), 2-(Chloro-phenyl methylene) malonic acid diethyl ester (0.5 g, 1.76), 2-methoxy-5-fluorophenyl boronic acid (0.601 g, 3.53 mmol), and  $K_2CO_3$  (0.735 g, 5.31 mmol) in THF (3mL) yielded 0.2 g (50 % yield) of the title product as a colorless liquid.  $R_f$  = 0.5 (hexane/ethyl acetate = 8.5:1.5); IR (Neat): 2982, 1728, 1619, 1591, 1494  $cm^{-1}$ .  $^1H$  NMR (250 MHz,  $CDCl_3$ ):  $\delta$  7.17 (m, 6H), 6.72 (m, 2H), 3.97 (m, 4H), 3.59 (s, 3H), 1.01 (m, 6H).  $^{13}C$  NMR (63 MHz,  $CDCl_3$ ):  $\delta$  166.0, 164.6, 158.4, 154.6, 152.5, 150.5, 139.5, 130.9, 128.8, 128.1, 126.7, 116.6, 112.1, 60.2, 56.1, 13.6. HRMS ( $EI^+$ ): m/z calculated for  $C_{21}H_{21}FO_5$ , 372.1373; found 372.1368.

**2-[phenyl- (3-trifluoromethyl-phenyl)-methylene] malonic acid diethyl ester****(Entry 13):**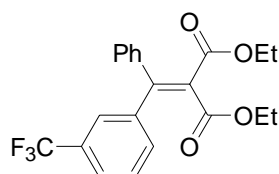

2-[phenyl- (3-trifluoromethyl-phenyl)-methylene] malonic acid diethyl ester was prepared using the general procedure. POPd, (3.5 mg, 0.0070 mmol, 1% mol), 2-(Chloro-phenyl methylene) malonic acid diethyl ester (0.2 g, 0.707 mmol), 3-trifluorophenyl boronic acid (0.161 g, 0.84 mmol), and  $K_2CO_3$  (0.29 g, 2.12 mmol) in THF (2mL) yielded 0.19 g (68% yield) of the title product as a pale brown solid.  $R_f$  = 0.3 (hexane/ethyl acetate = 9.5:0.5), mp = 58-59.5  $^{\circ}C$ . IR (KBr): 2980, 1721, 1698, 1604, 1444  $cm^{-1}$ .  $^1H$  NMR (250 MHz,  $CDCl_3$ ):  $\delta$  7.64 (m, 9H), 4.27(m, 4H), 1.21(m, 6H).  $^{13}C$  NMR (63 MHz,  $CDCl_3$ ):  $\delta$  153.2, 140.1, 138.5, 131.8, 128.9, 128.4, 128.1, 127.7, 125.1, 76.9, 76.4, 75.9, 60.9, 12.9. HRMS (FAB): m/z calculated for  $C_{21}H_{19}F_3O_4$ , 392.1235; found, 392.1346.

**2-[(3-Amino-phenyl)-phenylmethylene] malonic acid diethyl ester (Entry 14):**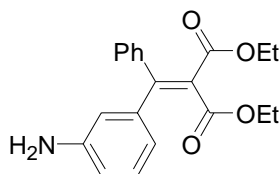

2-[(3-Amino-phenyl)-phenylmethylene] malonic acid diethyl ester was prepared using the general procedure. POPd, (9 mg, 0.017 mmol, 1% mol), 2-(Chloro-phenyl methylene) malonic acid diethyl ester (0.5g, 1.76 mmol), 3-aminophenyl boronic acid (0.493 g, 2.65 mmol), and  $K_2CO_3$  (0.733 g, 5.30 mmol) in THF (3mL) yielded 0.250 g (60% isolated yield) of the title product as a light brown solid.  $R_f$  = 0.5 (hexane/ethyl acetate = 7:3), mp = 73-74  $^{\circ}C$ . IR (KBr): 3462, 3372, 2988, 1731, 1597, 1488, 1445  $cm^{-1}$ .  $^1H$  NMR (250 MHz,  $CDCl_3$ ):  $\delta$  7.14 (m, 6H), 6.46(m, 2H), 6.37(s, 1H), 4.00(m, 4H), 3.56(bs, 2H), 0.95 (m, 6H).  $^{13}C$  NMR (63 MHz,  $CDCl_3$ ):  $\delta$  166.0, 165.8, 155.7, 146.0, 141.0, 139.8, 128.9, 127.9, 125.9, 119.3, 115.7, 115.4, 61.0, 13.5. HRMS (FAB): m/z calculated for  $C_{20}H_{21}NO_4$ , 339.1471; found, 339.1468.

**2-[(3-Hydroxy-phenyl)-phenyl methylene] malonic acid diethyl ester (Entry 15):**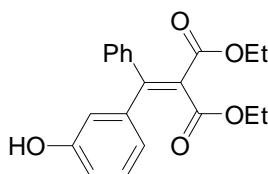

2-[(3-Hydroxy-phenyl)-phenyl methylene] malonic acid diethyl ester was prepared using the general procedure. POPd, (9 mg, 0.017 mmol, 1% mol), 2-(Chloro-phenyl methylene) malonic acid diethyl ester (0.5 g, 1.76 mmol), 3-hydroxyphenyl boronic acid (0.366 g, 2.65 mmol), and  $K_2CO_3$  (0.733 g, 5.30 mmol) in THF (3mL) yielded 0.380 g (63% yield) of the title product as a white colour solid.  $R_f$  = 0.5 (hexane/ethyl acetate = 7:3), mp = 94-95.5  $^{\circ}C$ . IR (KBr): 3389, 2989, 1707, 1673, 1578, 1444  $cm^{-1}$ .  $^1H$  NMR (250 MHz,  $CDCl_3$ ):  $\delta$  7.32 (m, 6H), 6.66 (m, 2H), 6.43(s, 1H), 5.70(bs, 1H), 4.14(m, 2H), 1.10(m, 6H).  $^{13}C$  NMR (63 MHz,  $CDCl_3$ ):  $\delta$  166.3, 155.6, 141.2, 139.6, 129.2, 129.1, 129.0, 128.0, 121.2, 116.3, 61.2, 13.5. HRMS (FAB): m/z calculated for  $C_{20}H_{20}O_5$ , 340.1311; found, 340.1374.

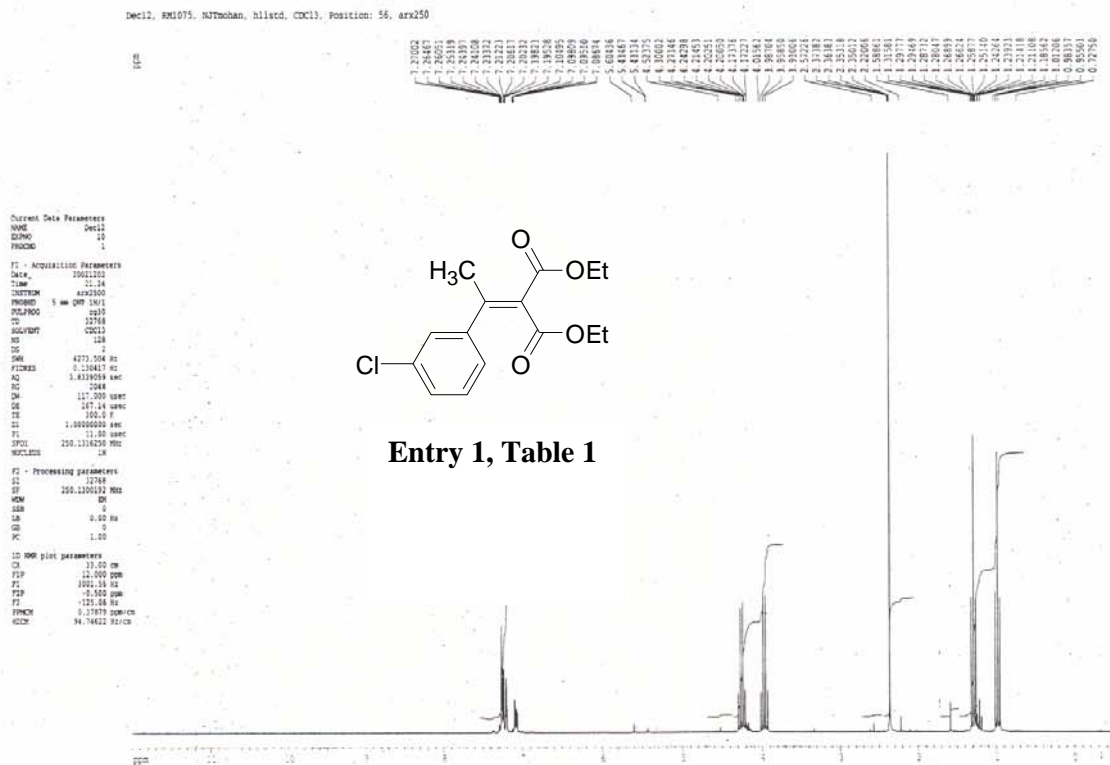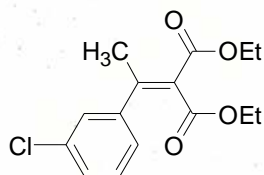

**Entry 1, Table 1**

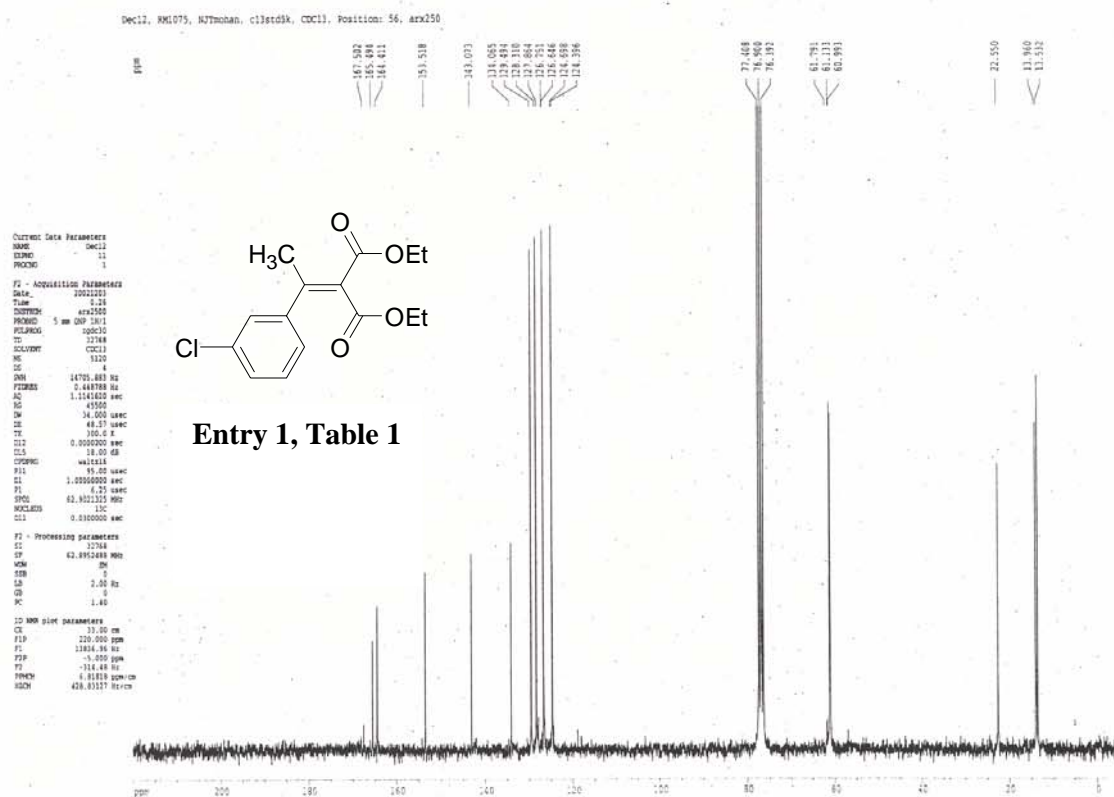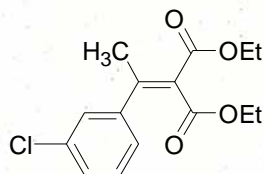

**Entry 1, Table 1**

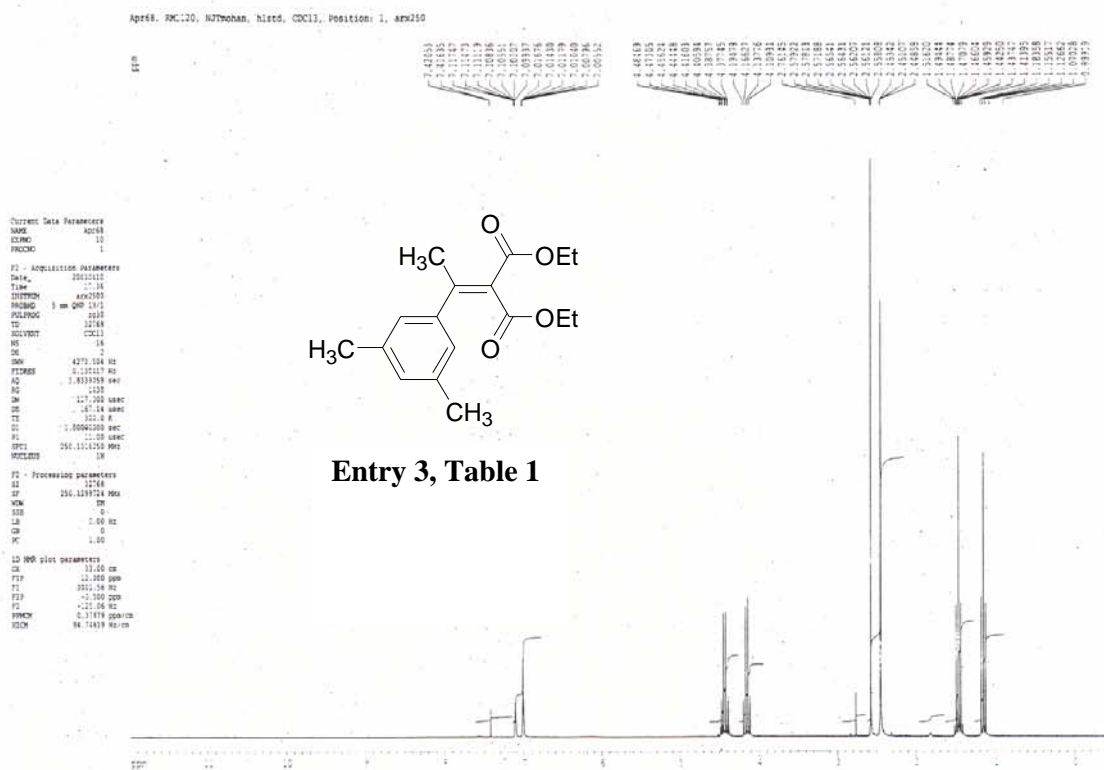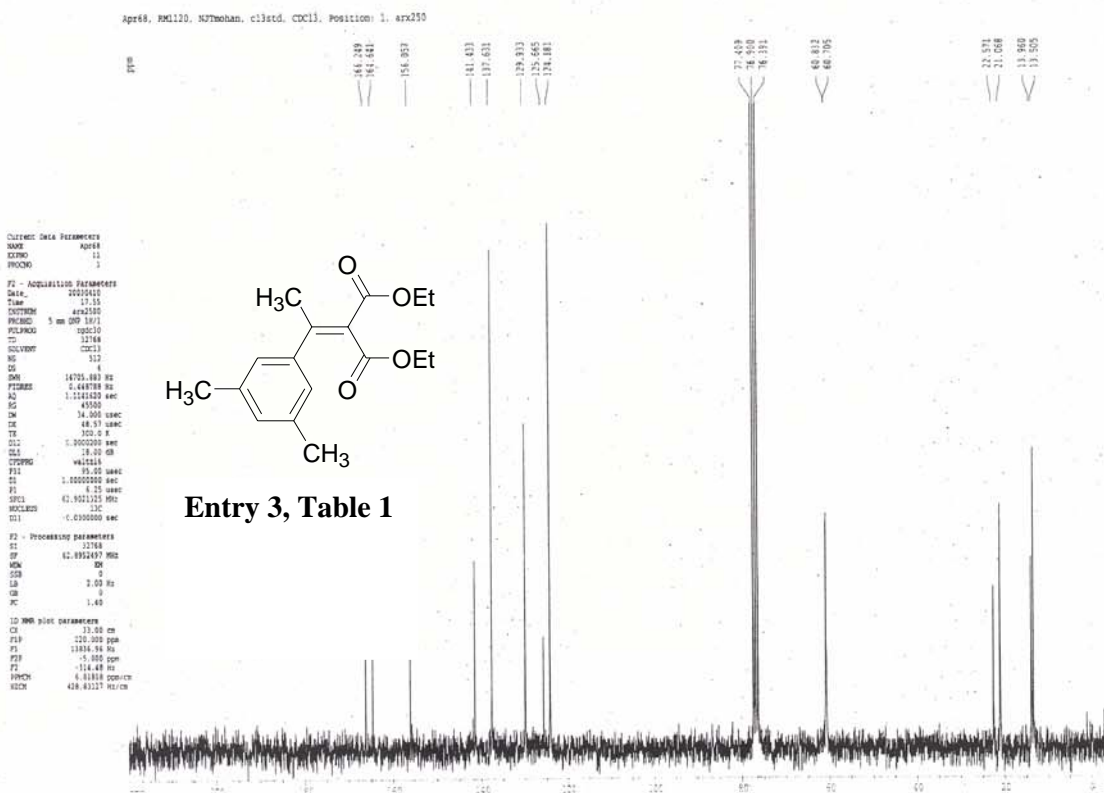

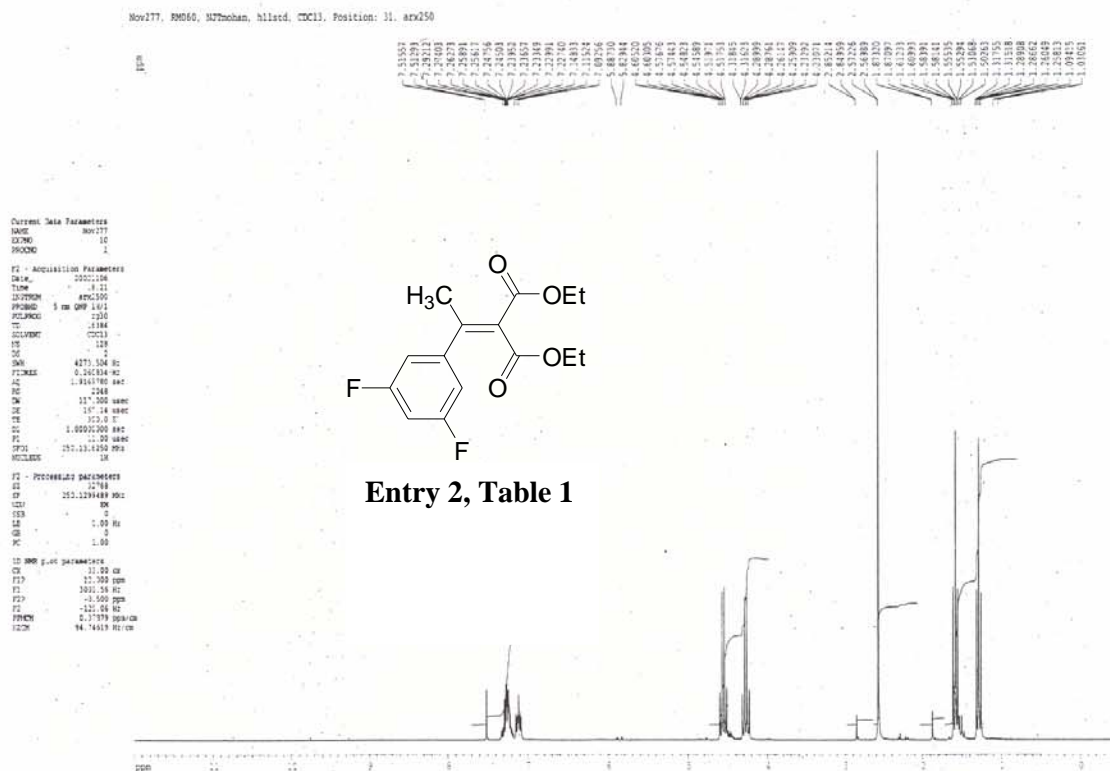

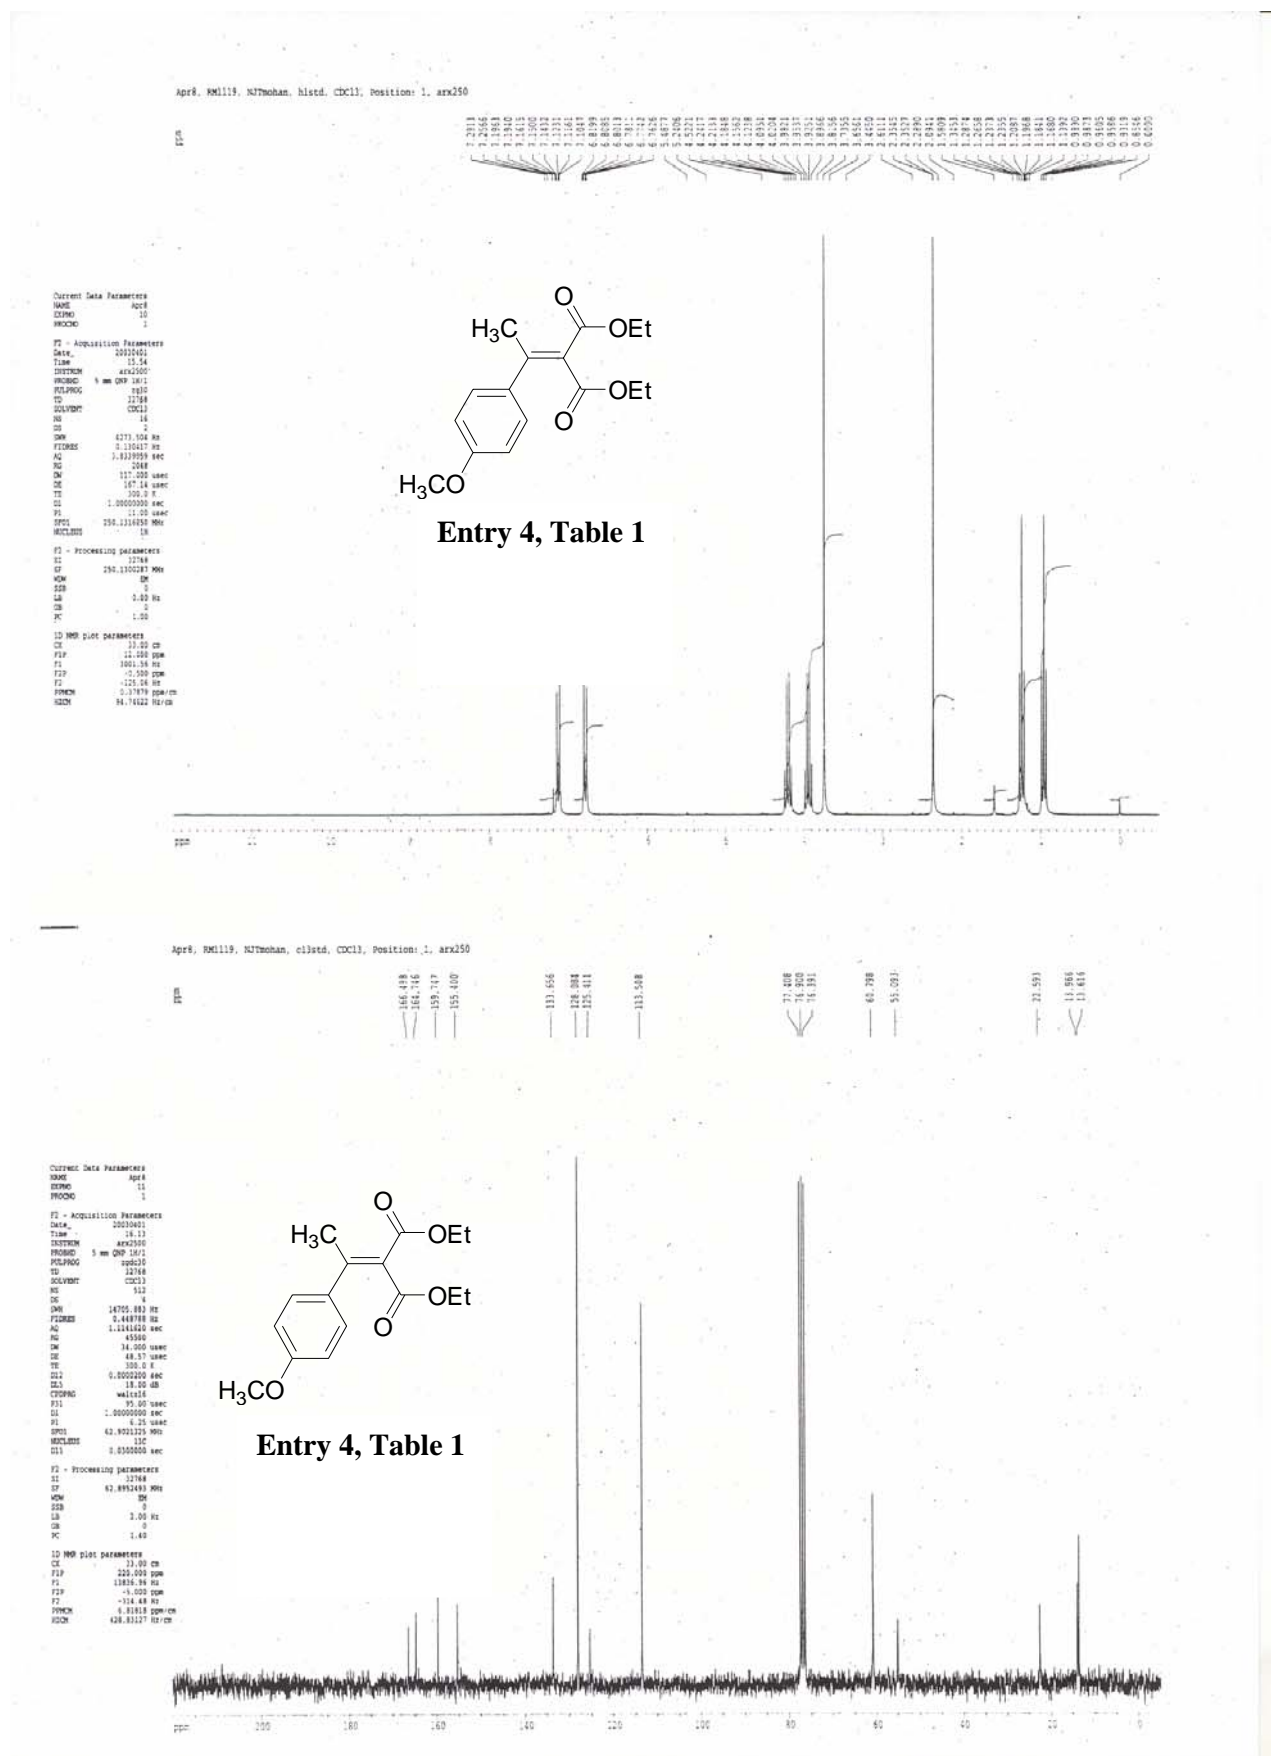

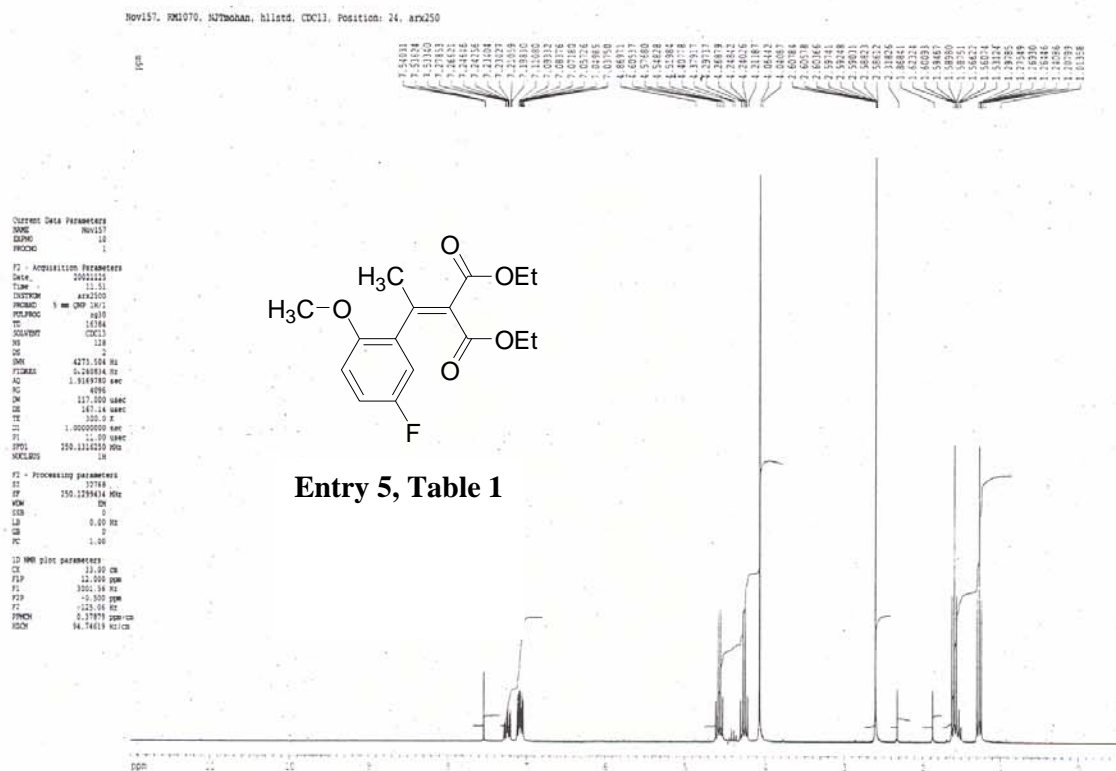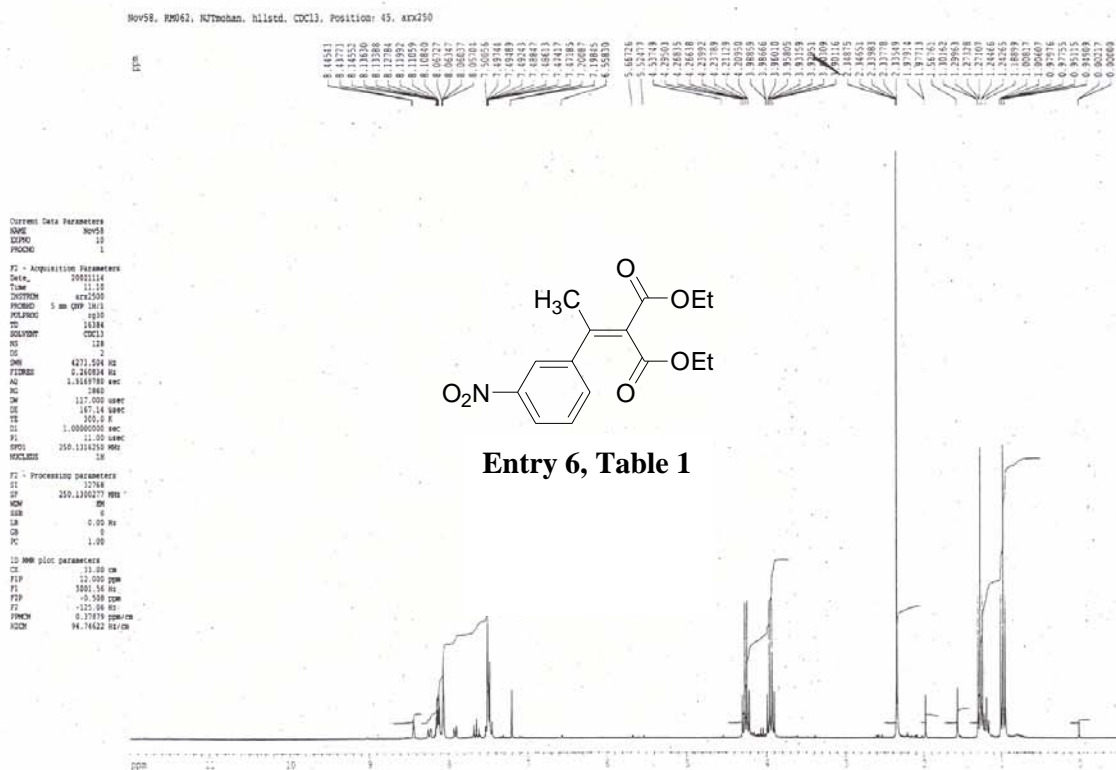

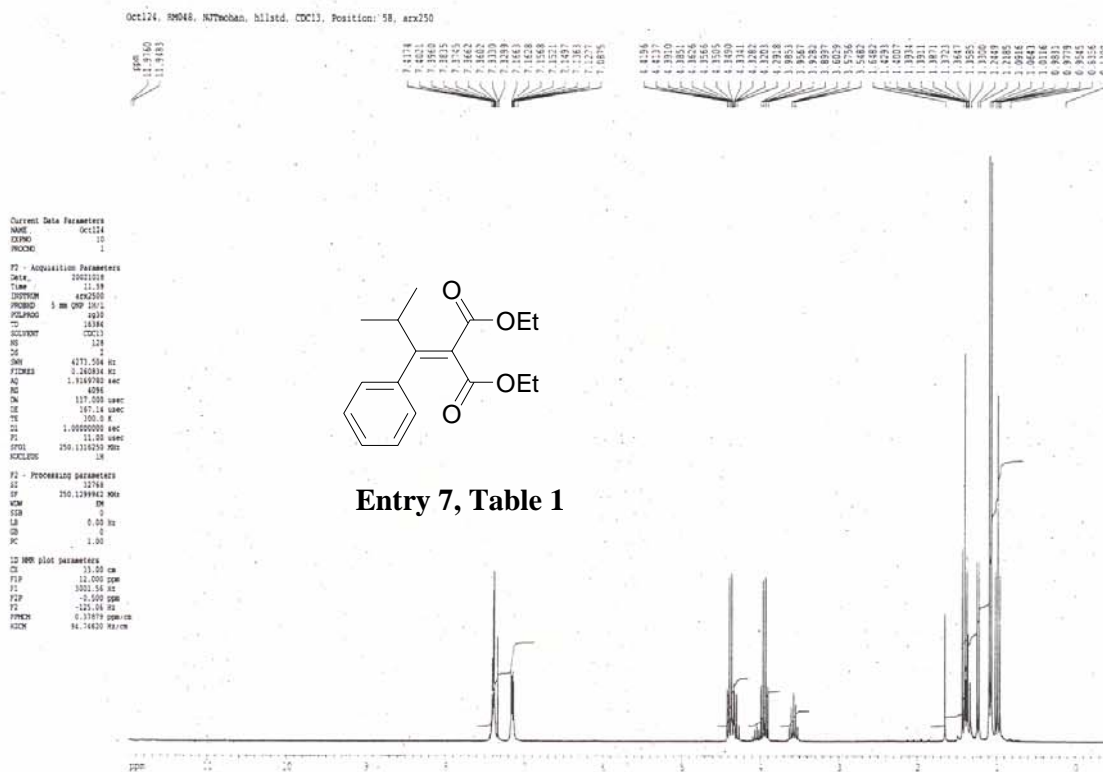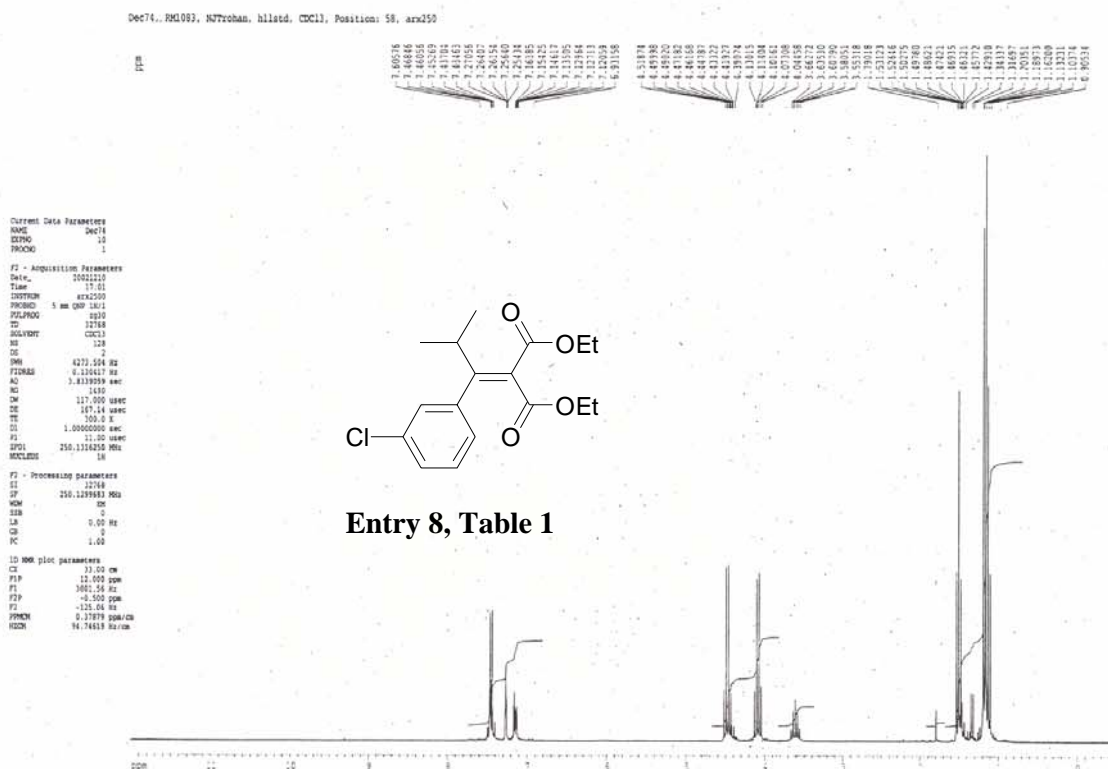



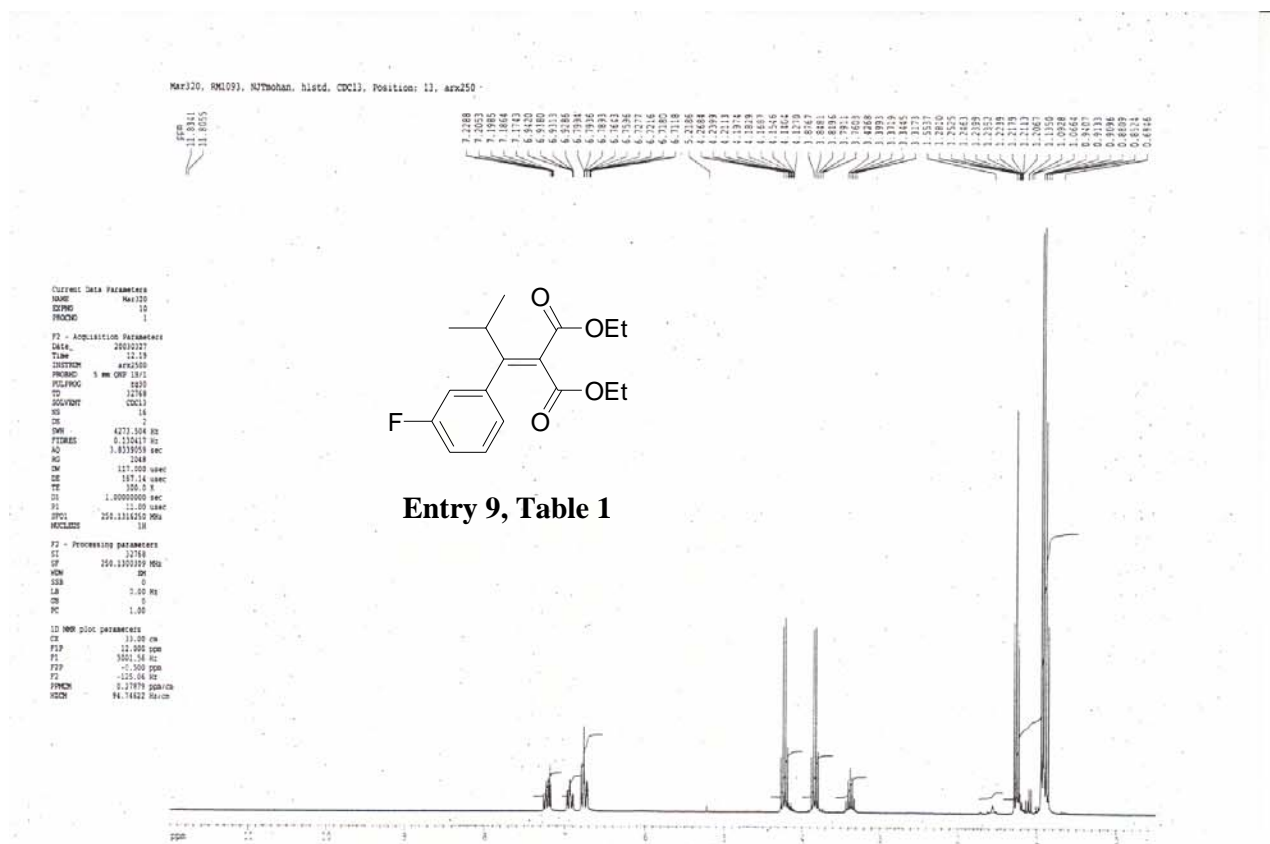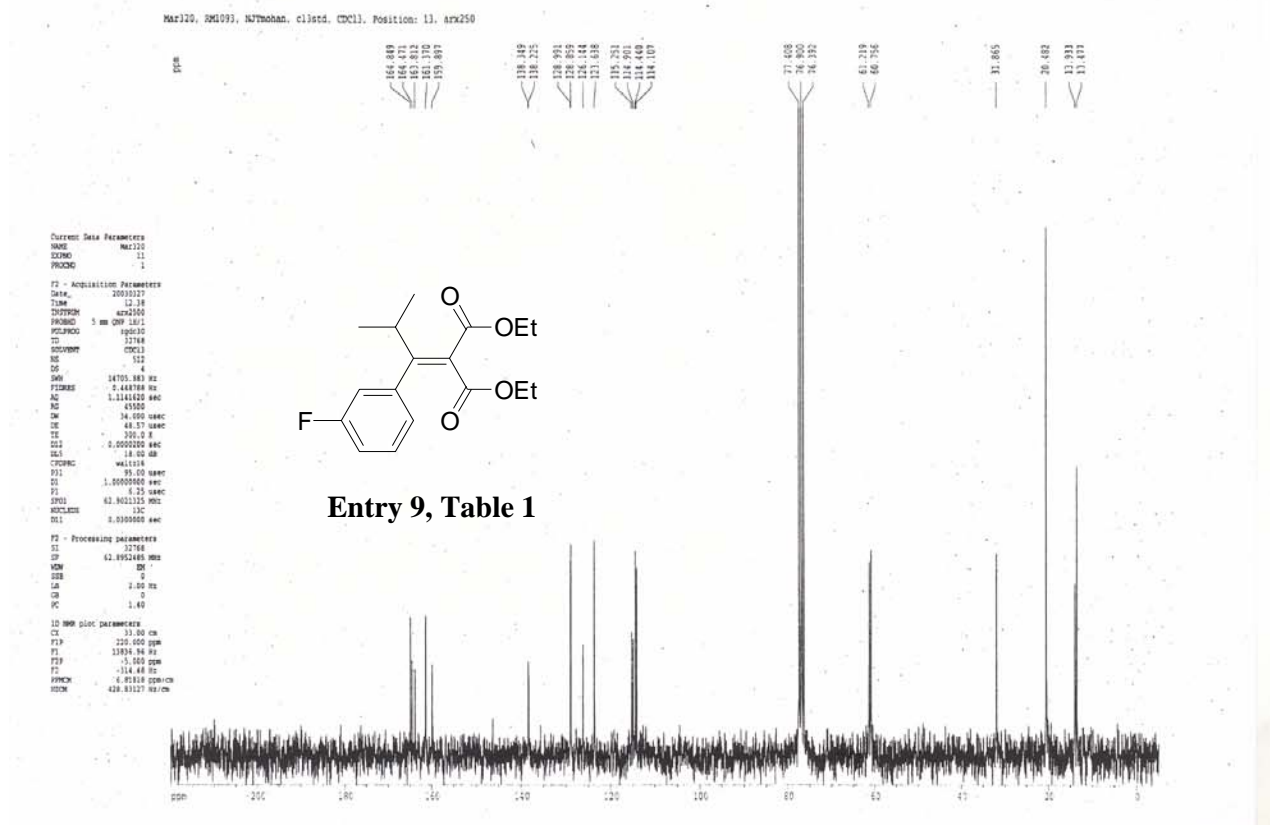

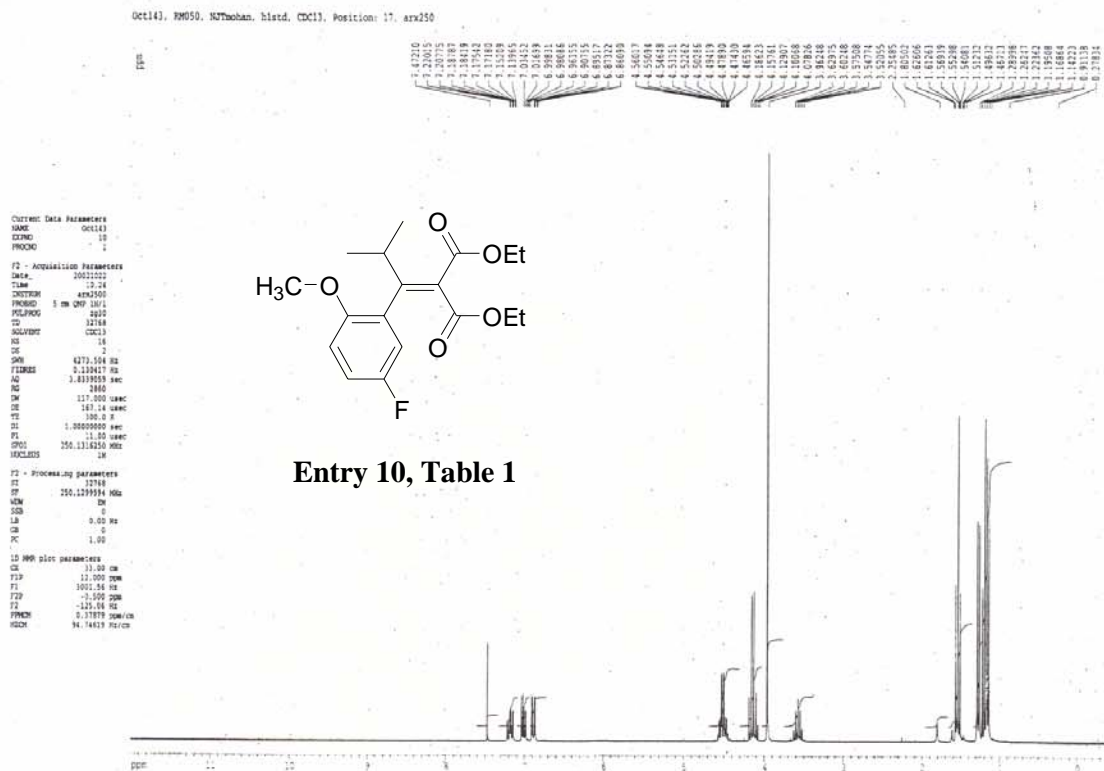**Entry 10, Table 1**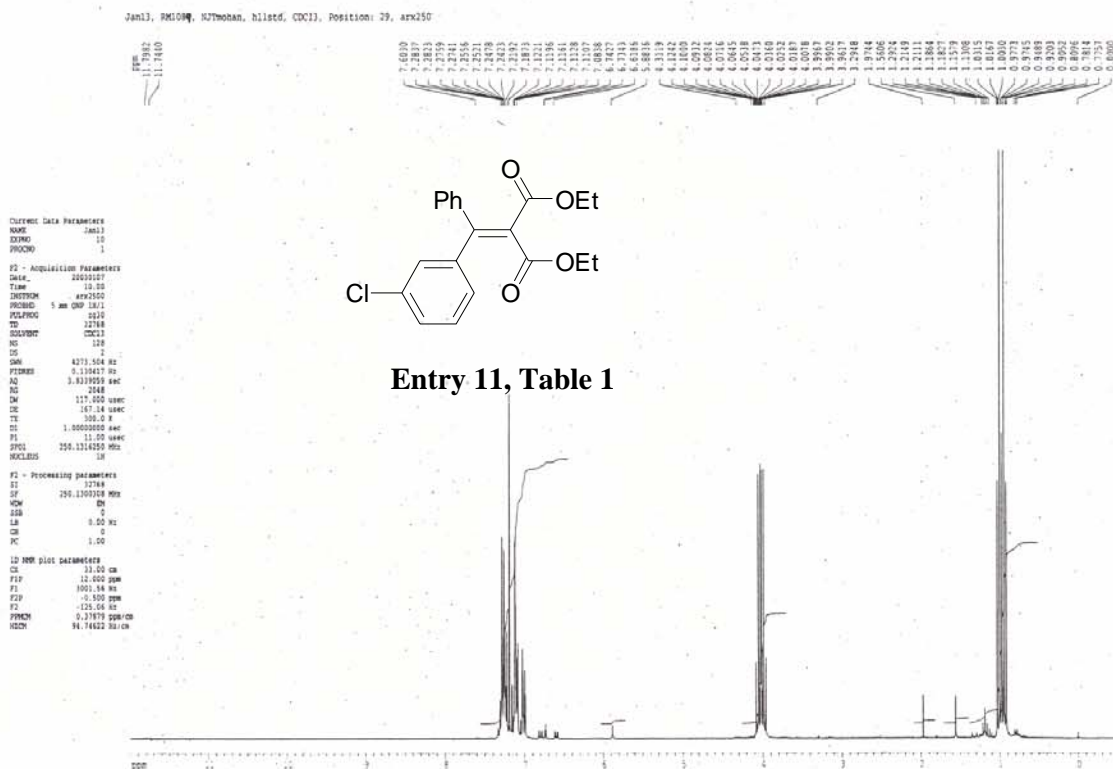

**Entry 11, Table 1**

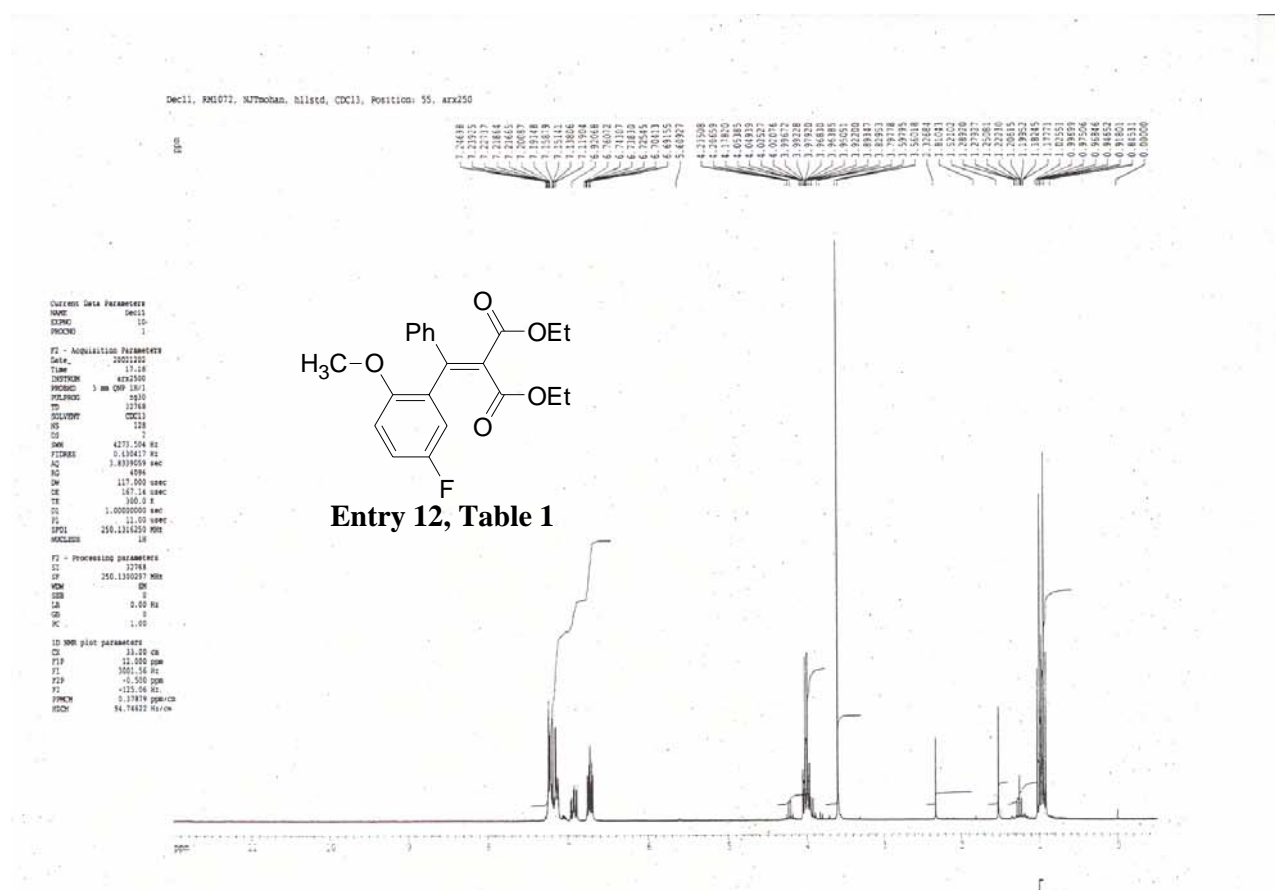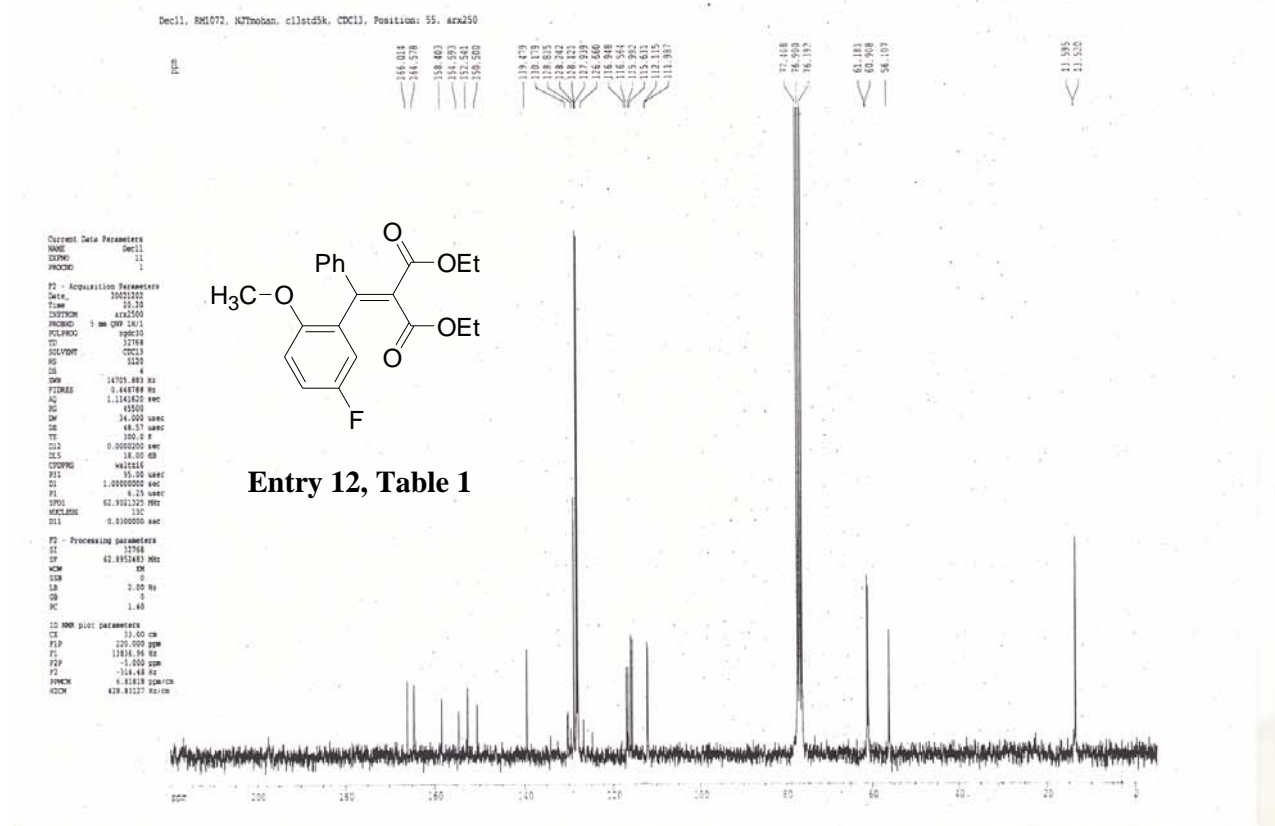

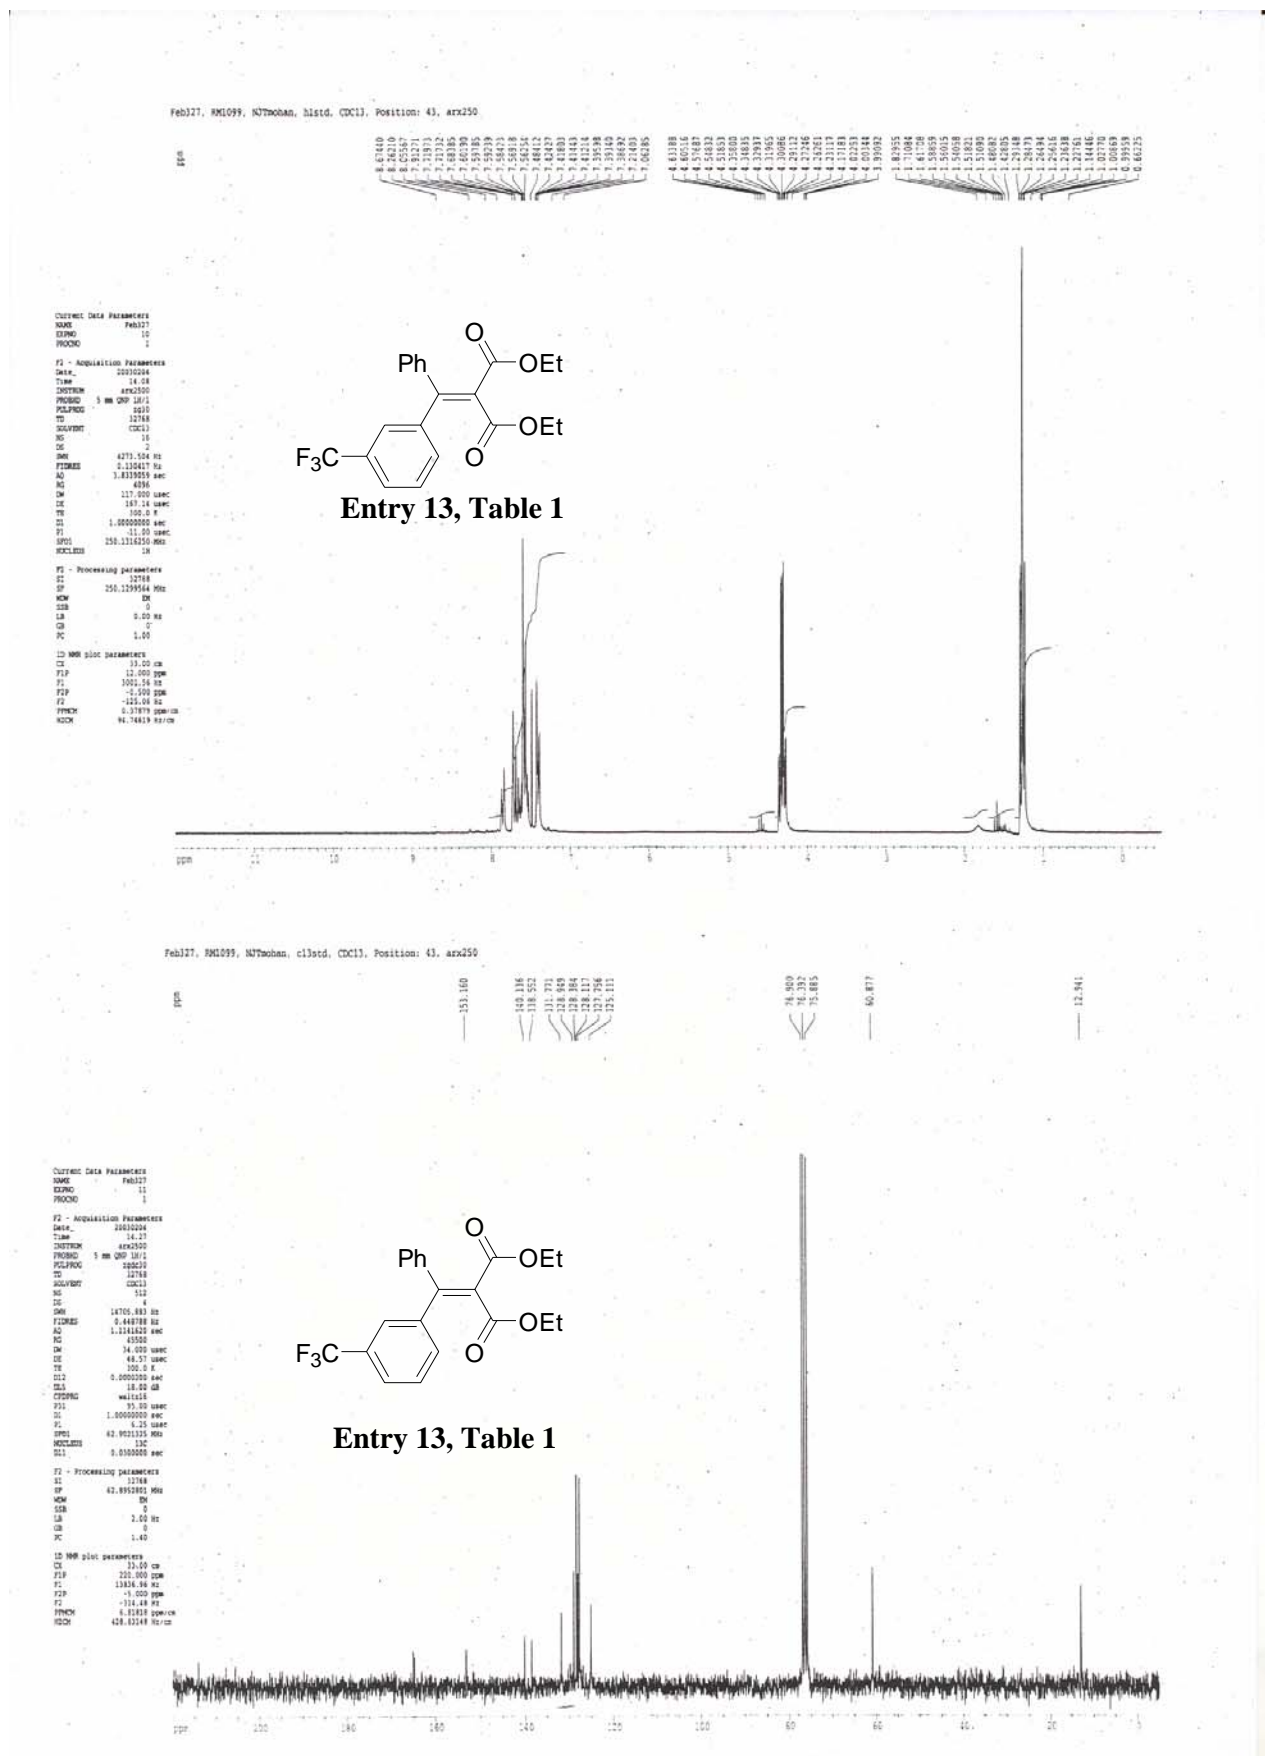

Jan245, RM1095, N77mohan, h1std, CDCl3, Position: 21, arx250

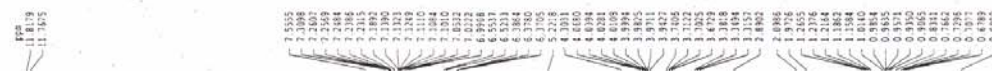

Current Data Parameters  
NAME Jan245  
EXPNO 12  
PROCNO 1

F2 - Acquisition Parameters  
Date\_ 20030127  
Time 18.22  
INSTRUM arx250  
PROBHD 5 mm QNP 1H/1  
PULPROG zgpg30  
TD 32768  
SOLVENT CDCl3  
NS 16  
DS 4  
SWH 8270.104 Hz  
FIDRES 0.136417 Hz  
AQ 1.832004 sec  
RG 2880  
RM 187.000 usec  
DE 187.14 usec  
TE 300.2 K  
D1 1.00000000 sec  
F1 41.00 usec  
SFO1 256.131213 MHz  
NUC1H3 1H

F2 - Processing parameters  
SI 32768  
SF 256.130301 MHz  
WDW EM  
SSB 0  
LB 0.00 Hz  
GB 0  
PC 1.40

1D 1H00 plot parameters  
SI 32.00 CH  
F1P 12.000 ppm  
F1 3080.54 Hz  
F2P -0.850 ppm  
F2 125.00 Hz  
FPCW 0.17879 ppm/CH  
RG2H 64.74622 Hz/CH

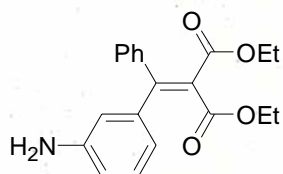

Entry 14, Table 1

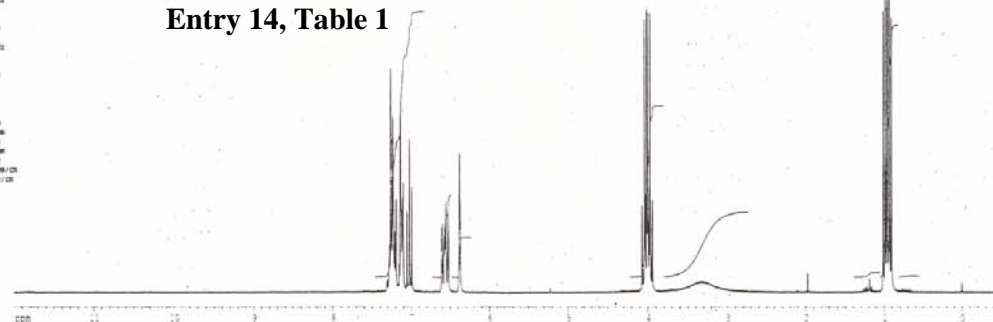

Jan245, RM1095, N77mohan, c1std, CDCl3, Position: 21, arx250

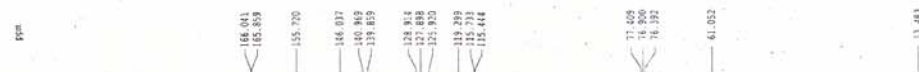

Current Data Parameters  
NAME Jan245  
EXPNO 12  
PROCNO 1

F2 - Acquisition Parameters  
Date\_ 20030127  
Time 18.62  
INSTRUM arx250  
PROBHD 5 mm QNP 1H/1  
PULPROG zgpg30  
TD 32768  
SOLVENT CDCl3  
NS 16  
DS 4  
SWH 14700.877 Hz  
FIDRES 0.448780 Hz  
AQ 1.141610 sec  
RG 4550  
RM 34.000 usec  
DE 48.17 usec  
TE 300.2 K  
D1 0.00000000 sec  
D12 12.00 CH  
CPDPRG waltz16  
F1P 85.00 usec  
F1 1.00000000 sec  
F2 6.25 usec  
SFO1 62.902479 MHz  
NUC1H3 13C  
D11 0.000000 sec

F2 - Processing parameters  
SI 32768  
SF 62.8952479 MHz  
WDW EM  
SSB 0  
LB 2.00 Hz  
GB 0  
PC 1.40

1D 1H00 plot parameters  
SI 32.00 CH  
F1P 220.000 ppm  
F1 12876.96 Hz  
F2P -0.500 ppm  
F2 124.48 Hz  
FPCW 0.0010 ppm/CH  
RG2H 62.81127 Hz/CH

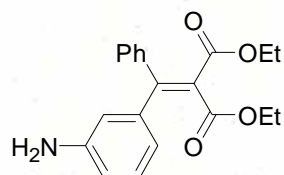

Entry 14, Table 1

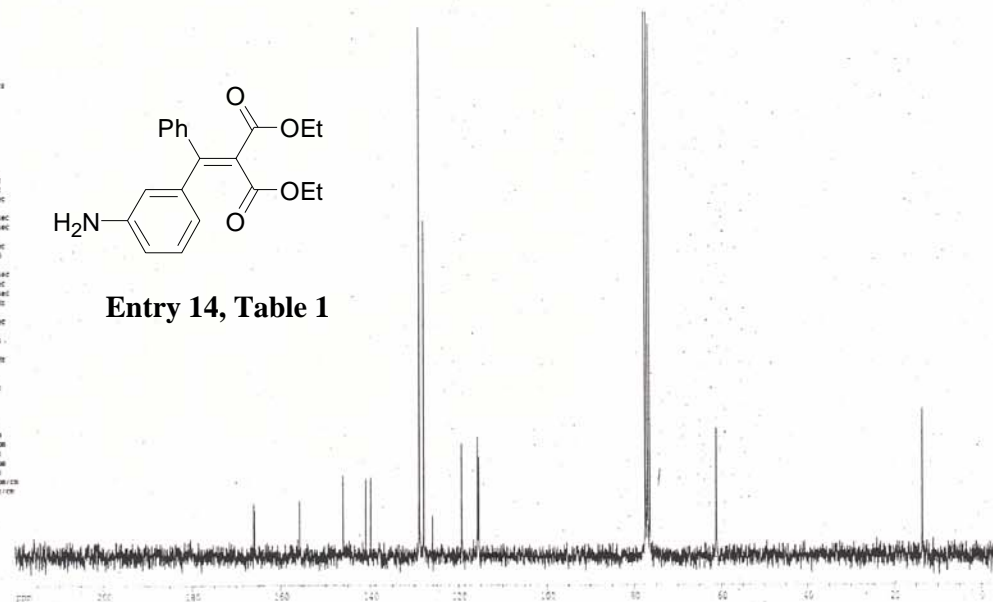

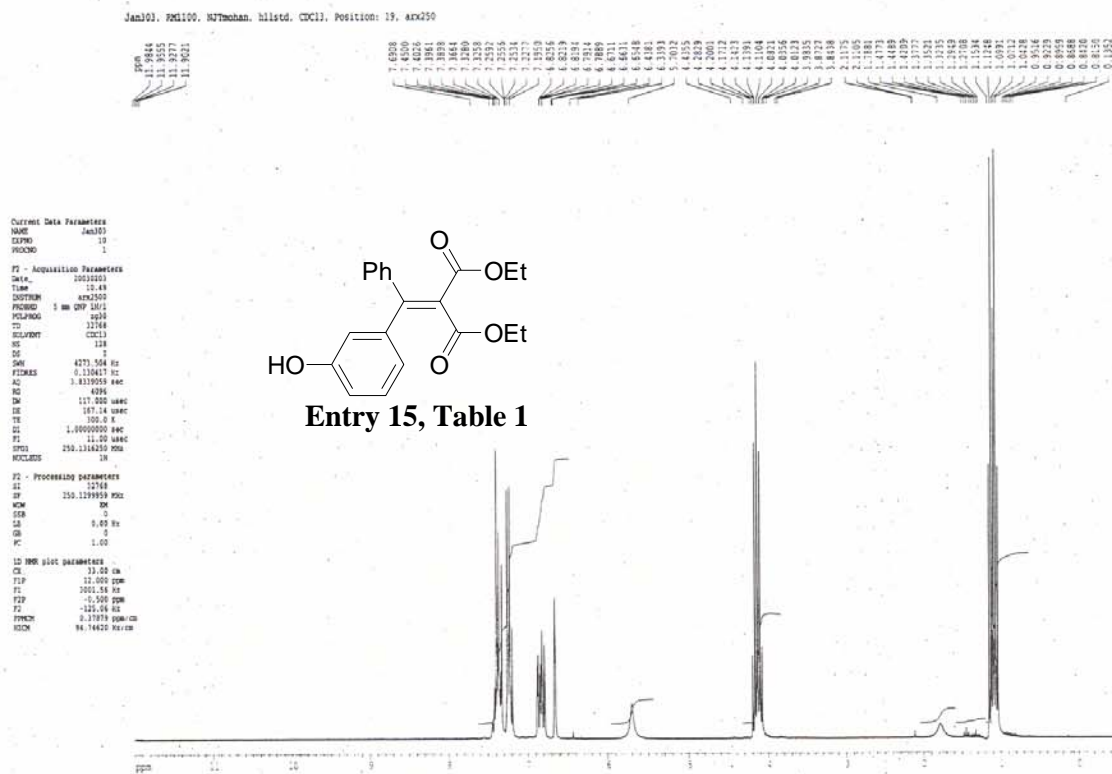

Supplement: Supplementary file 1 [file 5161696]
